# Supplementary material for: BaI3O9H: a new alkaline-earth metal hydroxy iodate with two groups
Source: Royal Society of Chemistry journal article supplement (doi:10.1039/d2nj02226e), 2022-01-01
Supplement: d2nj02226e1.pdf [file d2nj02226e1.pdf]

**BaI<sub>3</sub>O<sub>9</sub>OH: A new alkaline-earth metal hydroxy iodates with two groups**

Wenjuan Ma,<sup>a,b</sup> Jianlong Huang,<sup>a,b</sup> Bin Dai<sup>a,b</sup> and Feng Yu<sup>\*a,b</sup>

- a. Key Laboratory for Green Processing of Chemical Engineering of Xinjiang Bingtuan, School of Chemistry and Chemical Engineering, Shihezi University, Shihezi 832003, P.R. China.
- b. Carbon Neutralization and Environmental Catalytic Technology Laboratory, Bingtuan Industrial Technology Research Institute, Shihezi University, Shihezi 832003, P.R. China.

**\*Corresponding author: [yufeng05@mail.ipc.ac.cn](mailto:yufeng05@mail.ipc.ac.cn)**

## Supporting Information

**Table S1.** Atomic coordinates ( $\times 10^4$ ), equivalent isotropic displacement parameters ( $\text{\AA}^2 \times 10^3$ ), and bond valence sum (BVS) calculations for  $\text{BaI}_3\text{O}_9\text{H}$ .  $U_{\text{eq}}$  is defined as one-third of the trace of the orthogonalized  $U_{ij}$  tensor.

| Atom   | $x/a$      | $y/b$     | $z/c$    | $U_{\text{eq}}$ | BVS  |
|--------|------------|-----------|----------|-----------------|------|
| Ba (1) | 6525(1)    | 2036(1)   | 5010(1)  | 13(1)           | 2.13 |
| I (1)  | 9371(1)    | 2082(1)   | 7706(1)  | 12(1)           | 5.47 |
| I (2)  | 4719(1)    | 105(1)    | 7691(1)  | 10(1)           | 5.23 |
| I (3)  | 8211(1)    | 6705(1)   | 4675(1)  | 11(1)           | 5.47 |
| O (1)  | 11640(7)   | 2944(7)   | 7635(5)  | 27(1)           | 1.78 |
| O (2)  | 9865(6)    | 3245(6)   | 4521(4)  | 22(1)           | 1.92 |
| O (3)  | 6804(6)    | 5554(6)   | 5420(4)  | 20(1)           | 2.13 |
| O (4)  | 4460(6)    | 446(5)    | 3471(4)  | 15(1)           | 2.10 |
| O (5)  | 8428(6)    | 4023(5)   | 8032(4)  | 22(1)           | 1.96 |
| O (6)  | 6627(6)    | 1046(5)   | 8300(4)  | 15(1)           | 2.20 |
| O (7)  | 4932(6)    | -1882(5)  | 8304(4)  | 15(1)           | 2.06 |
| O (8)  | 7310(6)    | 8717(6)   | 4874(4)  | 25(1)           | 2.33 |
| O (9)  | 9041(6)    | 2163(6)   | 6420(4)  | 24(1)           | 2.24 |
| H (1)  | 12160(100) | 3260(100) | 8140(70) | 29              |      |

**Table S2.** Bond lengths (Å) and angles (°) for BaI<sub>3</sub>O<sub>9</sub>H.

|                          |            |                          |            |
|--------------------------|------------|--------------------------|------------|
| Ba (1)-O (2)             | 2.882(5)   | I (1)-O (1)              | 1.902(5)   |
| Ba (1)-O (3)             | 2.876(5)   | I (1)-O (5)              | 1.784(4)   |
| Ba (1)-O (3) #1          | 3.259(5)   | I (1)-O (6)              | 2.466(5)   |
| Ba (1)-O (4) #2          | 3.012(5)   | I (1)-O (9)              | 1.781(5)   |
| Ba (1)-O (4)             | 2.894(4)   | I (2)-O (4) #2           | 1.808(5)   |
| Ba (1)-O (5) #3          | 3.278(6)   | I (2)-O (6)              | 1.830(4)   |
| Ba (1)-O (6) #3          | 2.819(5)   | I (2)-O (7)              | 1.804(4)   |
| Ba (1)-O (7) #4          | 2.774(5)   | I (3)-O (2) #6           | 1.819(5)   |
| Ba (1)-O (8) #1          | 3.055(5)   | I (3)-O (3)              | 1.791(5)   |
| Ba (1)-O (8) #5          | 2.733(5)   | I (3)-O (8)              | 1.782(5)   |
| Ba (1)-O (9)             | 2.692(5)   |                          |            |
| O (2)-Ba (1)-O (3) #1    | 118.42(13) | O (7) #4-Ba (1)-O (8) #1 | 65.02(14)  |
| O (2)-Ba (1)-O (4)       | 116.76(14) | O (8) #5-Ba (1)-O (2)    | 95.93(15)  |
| O (2)-Ba (1)-O (4) #2    | 130.29(13) | O (8) #5-Ba (1)-O (3) #1 | 137.75(14) |
| O (2)-Ba (1)-O (5) #3    | 56.18(13)  | O (8) #5-Ba (1)-O (3)    | 161.65(15) |
| O (2)-Ba (1)-O (8) #1    | 166.36(14) | O (8) #1-Ba (1)-O (3) #1 | 50.00(12)  |
| O (3)-Ba (1)-O (2)       | 69.97(14)  | O (8) #5-Ba (1)-O (4)    | 68.90(14)  |
| O (3)-Ba (1)-O (3) #1    | 60.56(15)  | O (8) #5-Ba (1)-O (4) #2 | 58.17(15)  |
| O (3)-Ba (1)-O (4)       | 127.44(13) | O (8) #1-Ba (1)-O (5) #3 | 118.30(13) |
| O (3)-Ba (1)-O (4) #2    | 121.85(14) | O (8) #5-Ba (1)-O (5) #3 | 65.19(15)  |
| O (3)-Ba (1)-O (5) #3    | 112.55(13) | O (8) #5-Ba (1)-O (6) #3 | 117.12(16) |
| O (3) #1-Ba (1)-O (5) #3 | 112.86(12) | O (8) #5-Ba (1)-O (7) #4 | 117.54(15) |
| O (3)-Ba (1)-O (8) #1    | 104.31(13) | O (8) #5-Ba (1)-O (8) #1 | 91.92(14)  |
| O (4) #2-Ba (1)-O (3) #1 | 106.83(12) | O (9)-Ba (1)-O (2)       | 61.62(13)  |
| O (4)-Ba (1)-O (3) #1    | 73.68(12)  | O (9)-Ba (1)-O (3)       | 77.08(14)  |

|                          |            |                       |            |
|--------------------------|------------|-----------------------|------------|
| O (4)-Ba (1)-O (4) #2    | 93.98(13)  | O (9)-Ba (1)-O (3) #1 | 130.70(14) |
| O (4)-Ba (1)-O (5) #3    | 62.14(13)  | O (9)-Ba (1)-O (4)    | 154.72(14) |
| O (4) #2-Ba (1)-O (5) #3 | 123.29(12) | O (9)-Ba (1)-O (4) #2 | 73.94(14)  |
| O (4) #2-Ba (1)-O (8) #1 | 63.34(13)  | O (9)-Ba (1)-O (5) #3 | 105.60(14) |
| O (4)-Ba (1)-O (8) #1    | 56.16(15)  | O (9)-Ba (1)-O (6) #3 | 122.33(14) |
| O (6) #3-Ba (1)-O (2)    | 63.83(13)  | O (9)-Ba (1)-O (7) #4 | 72.28(15)  |
| O (6) #3-Ba (1)-O (3) #1 | 65.19(13)  | O (9)-Ba (1)-O (8) #1 | 130.31(16) |
| O (6) #3-Ba (1)-O (3)    | 68.08(14)  | O (6) #3-Ba (1)-O (3) | 68.08(14)  |
| O (6) #3-Ba (1)-O (4)    | 70.28(13)  | O (1)-I (1)-O (6)     | 163.6(2)   |
| O (6) #3-Ba (1)-O (4) #2 | 163.61(13) | O (5)-I (1)-O (1)     | 95.3(2)    |
| O (6) #3-Ba (1)-O (5) #3 | 53.97(12)  | O (5)-I (1)-O (6)     | 80.6(2)    |
| O (6) #3-Ba (1)-O (8) #1 | 102.63(14) | O (9)-I (1)-O (1)     | 91.4(2)    |
| O (7) #4-Ba (1)-O (2)    | 120.08(14) | O (9)-I (1)-O (5)     | 100.3(2)   |
| O (7) #4-Ba (1)-O (3) #1 | 67.31(13)  | O (9)-I (1)-O (6)     | 104.9(2)   |
| O (7) #4-Ba (1)-O (3)    | 63.92(14)  | O (4) #2-I (2)-O (6)  | 101.1(2)   |
| O (7) #4-Ba (1)-O (4) #2 | 59.64(12)  | O (7)-I (2)-O (4) #2  | 99.9(2)    |
| O (7) #4-Ba (1)-O (4)    | 121.13(14) | O (7)-I (2)-O (6)     | 95.4(2)    |
| O (7) #4-Ba (1)-O (5) #3 | 176.07(12) | O (3)-I (3)-O (2) #6  | 99.8(2)    |
| O (7) #4-Ba (1)-O (6) #3 | 124.12(13) | O (8)-I (3)-O (2) #6  | 101.8(2)   |
| O (9)-Ba (1)-O (8) #5    | 85.95(16)  | O (8)-I (3)-O (3)     | 96.9(2)    |

Symmetry transformations used to generate equivalent atoms:

|                       |                          |                       |
|-----------------------|--------------------------|-----------------------|
| #1 $x, y-1, z$        | #2 $-x+1, y+1/2, -z+3/2$ | #3 $x, -y+1/2, z-1/2$ |
| #4 $-x+1, -y, -z+1$   | #5 $-x+1, -y+1, -z+1$    | #6 $-x+2, -y+1, -z+1$ |
| #7 $x, -y+1/2, z+1/2$ | #8 $-x+1, y-1/2, -z+3/2$ | #9 $x, y+1, z$        |

**Table S3.** Anisotropic displacement parameters ( $\text{\AA}^2$ ) for  $\text{BaI}_3\text{O}_9\text{H}$ .

| Atom   | $U_{11}$ | $U_{22}$ | $U_{33}$ | $U_{23}$ | $U_{13}$ | $U_{12}$ |
|--------|----------|----------|----------|----------|----------|----------|
| Ba (1) | 14(1)    | 13(1)    | 11(1)    | 1(1)     | 1(1)     | -2(1)    |
| I (1)  | 12(1)    | 14(1)    | 10(1)    | 1(1)     | 0(1)     | 0(1)     |
| I (2)  | 9(1)     | 11(1)    | 10(1)    | -1(1)    | 0(1)     | 1(1)     |
| I (3)  | 11(1)    | 13(1)    | 9(1)     | 0(1)     | 2(1)     | -1(1)    |
| O (1)  | 16(3)    | 37(3)    | 27(4)    | 2(3)     | 1(3)     | -10(2)   |
| O (2)  | 19(3)    | 33(3)    | 12(3)    | 4(2)     | -6(2)    | -6(2)    |
| O (3)  | 27(3)    | 17(2)    | 16(3)    | 1(2)     | 6(2)     | -9(2)    |
| O (4)  | 19(3)    | 15(2)    | 10(3)    | -2(2)    | 0(2)     | 1(2)     |
| O (5)  | 19(3)    | 19(2)    | 28(3)    | -8(2)    | -3(3)    | 7(2)     |
| O (6)  | 12(2)    | 18(2)    | 15(3)    | -1(2)    | 1(2)     | -4(2)    |
| O (7)  | 22(3)    | 11(2)    | 13(3)    | 1(2)     | 2(2)     | -1(2)    |
| O (8)  | 25(3)    | 16(3)    | 34(4)    | -4(2)    | 11(3)    | 2(2)     |
| O (9)  | 20(3)    | 42(3)    | 11(3)    | 1(2)     | -1(2)    | 0(2)     |

**Table S4.** Hydrogen bond lengths [ $\text{\AA}$ ] and angles [deg.] for  $\text{BaI}_3\text{O}_9\text{H}$ . D, hydrogen bond donor; A, hydrogen bond acceptor.

| D-H $\cdots$ A                 | d (D-H) | d (H $\cdots$ A) | d (D $\cdots$ A) | $\angle$ (D-H $\cdots$ A) |
|--------------------------------|---------|------------------|------------------|---------------------------|
| O1-H1 $\cdots$ O4 <sup>1</sup> | 0.83(8) | 2.10(8)          | 2.748(7)         | 135(8)                    |

**Table S5.** The investigation of the reported some large birefringent alkali earth iodates.

| compound                                                                                                 | band gap (eV) | $\Delta n$ @1064 nm | refs. |
|----------------------------------------------------------------------------------------------------------|---------------|---------------------|-------|
| Ba <sub>2</sub> [FeF <sub>4</sub> (IO <sub>3</sub> ) <sub>2</sub> ]IO <sub>3</sub>                       | 3.9           | 0.125               | 1     |
| Ba[InF <sub>3</sub> (IO <sub>3</sub> ) <sub>2</sub> ]                                                    | 4.35          | 0.172               | 2     |
| Mg(H <sub>2</sub> O) <sub>6</sub> [(IO <sub>2</sub> (OH)) <sub>2</sub> (IO <sub>3</sub> ) <sub>2</sub> ] | 4.10          | 0.230               | 3     |
| Sr(IO <sub>3</sub> ) <sub>2</sub>                                                                        | 4.14          | 0.093               | 4     |
| Ba(IO <sub>2</sub> F <sub>2</sub> ) <sub>2</sub>                                                         | 4.34          | 0.092               | 4     |

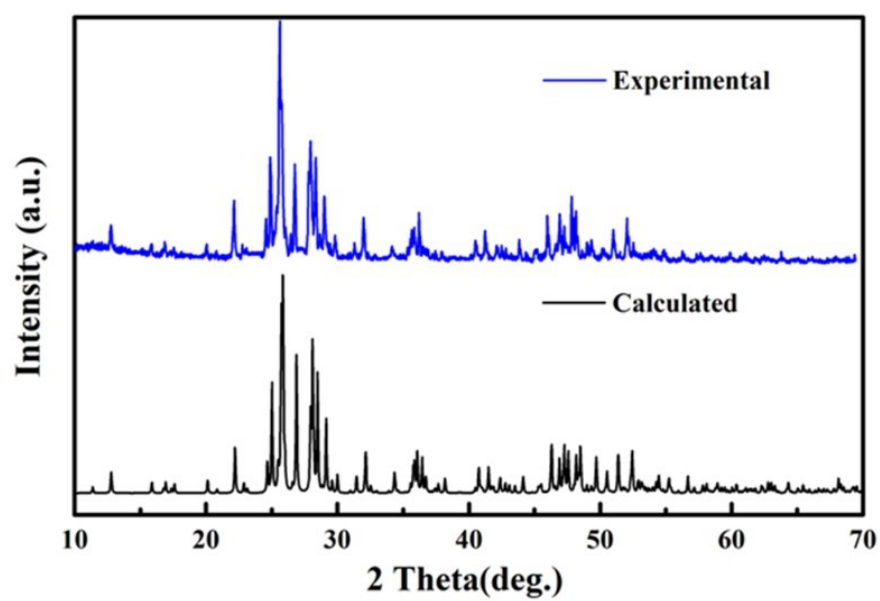

**Figure S1.** Experimental and calculated powder XRD pattern of BaI<sub>3</sub>O<sub>9</sub>H.



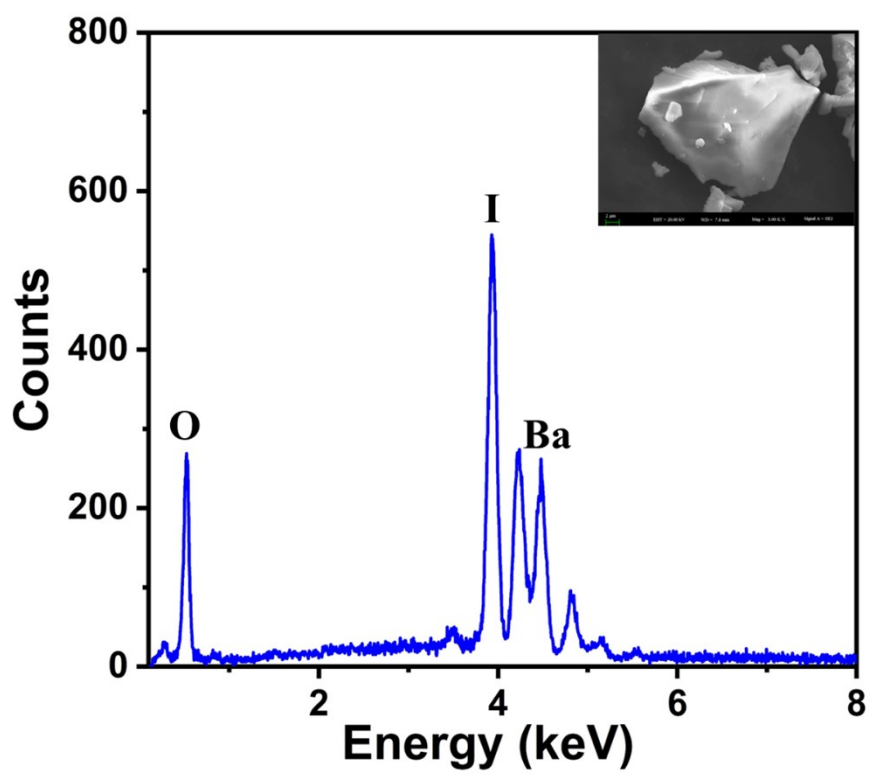

**Figure S2.** The energy dispersive X-ray spectroscopy (EDS) for BaI<sub>3</sub>O<sub>9</sub>H.

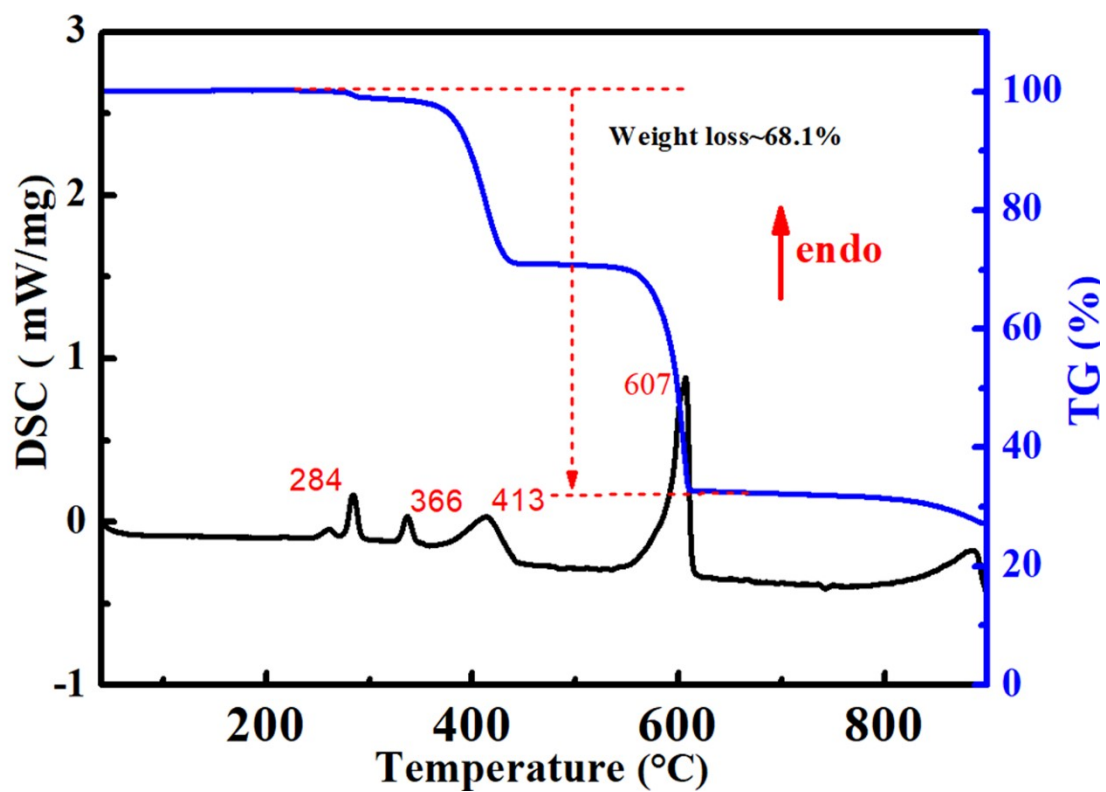

**Figure S3.** DSC and TG curves of BaI<sub>3</sub>O<sub>9</sub>H. It is speculated that the decomposition of BaI<sub>3</sub>O<sub>9</sub>H follows the following equation:  $4\text{BaI}_3\text{O}_9\text{H} = 4\text{BaO} + 6\text{I}_2\uparrow + 15\text{O}_2\uparrow + 2\text{H}_2\text{O}\uparrow$ . The calculated weight loss of gas is about 68.1 %, which is close to experimental value.

## References

1. Q. M. Huang, C. L. Hu, B. P. Yang, Z. Fang, Y. Huang, J. G. Mao, *Chem. Commun.*, 2021, **57**, 11525–11528.
2. X. Q. Jiang, H. P. Wu, H. W. Yu, Z. G. Hu, J. Y. Wang, Y. C. Wu, *Cryst. Growth Des.*, 2021, **21**, 4005–4012.
3. Y. Li, K. M. Ok, *J. Mater. Chem. C*, 2022, DOI: 10.1039/D2TC01638A.
4. M. Q. Gai, T. H. Tong, Y. Wang, Z. H. Yang, S. L. Pan, *Chem. Mater.*, 2020, **32**, 5723-5728.
